# Supplementary material for: Do influence at work and possibilities for development mitigate the impact of job demands for workers with and without depression
Source: PubMed Central journal article supplement (PMC10577017; doi:10.5271/sjweh.4069), 2023-02-27
Supplement: SJWEH-49-136-S001.pdf [file SJWEH-49-136-S001.pdf]

Do influence at work and possibilities for development mitigate the impact of job demands for workers with and without depression<sup>1</sup>

by Patricia Ots, MSc,<sup>2</sup> Anita C Keller, Dr, Eva Altrock, MSc, Sander KR van Zon, Dr, Sandra Brouwer, Prof

1. Supplementary material
2. Corresponding to: Patricia Ots, Department of Health Sciences, Community and Occupational Medicine, University Medical Center Groningen, University of Groningen, Hanzeplein 1, 9700 RB Groningen, The Netherlands. [E-mail: p.ots@umcg.nl]

**Supplementary figure S1.** Flow chart of inclusion in the Lifelines Cohort Study.

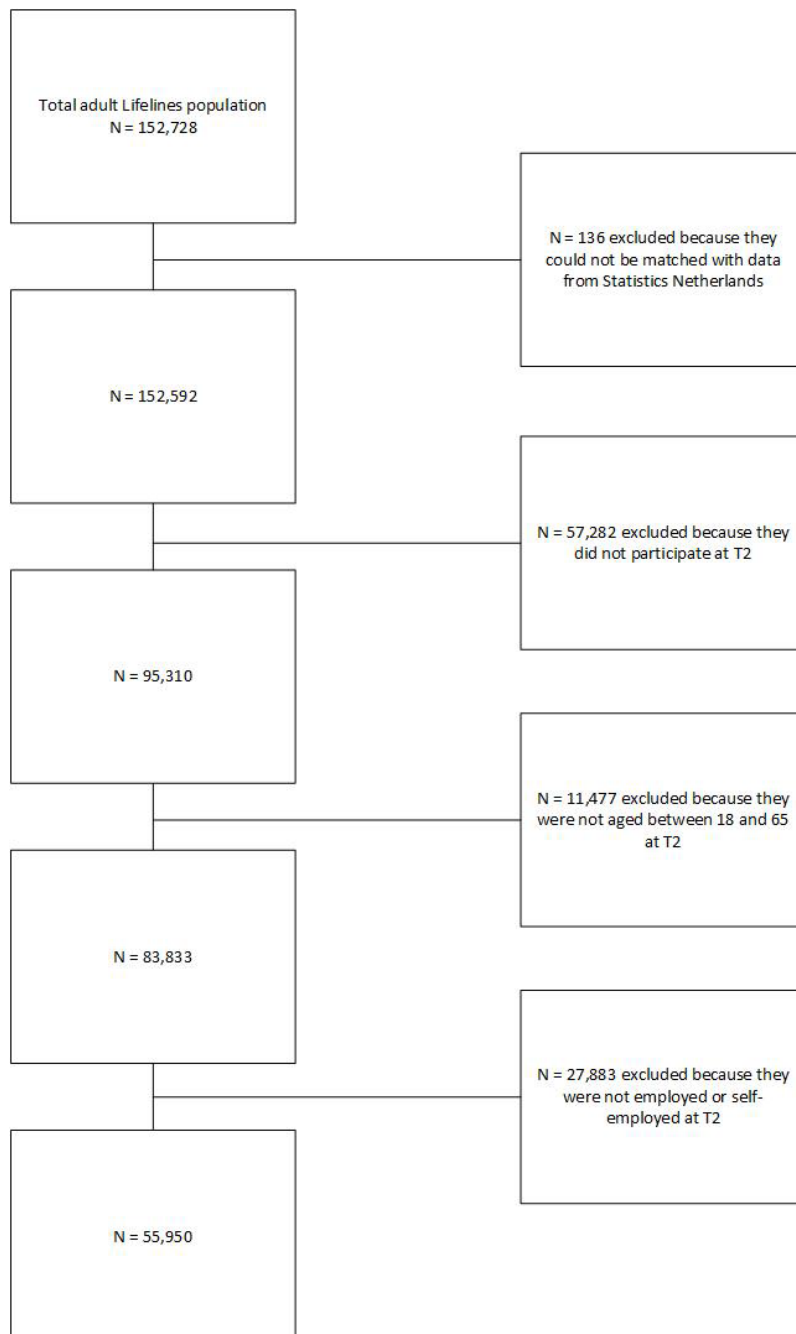

**Supplementary table S1.** Information on measurements from the Lifelines Cohort Study and Statistics Netherlands

|                        | <b>T0 (2006-2013)</b>                              | <b>T2 (2012-2015)</b>                                               | <b>Follow-up (T2-2018)</b> |
|------------------------|----------------------------------------------------|---------------------------------------------------------------------|----------------------------|
| Lifelines Cohort Study | Depression (MINI)                                  | Working conditions:<br>Job demands and job<br>resources (COPSOQ-II) |                            |
| Lifelines Cohort Study | Control variables:<br>Educational level,<br>gender | Control variables:<br>Age, perceived health                         |                            |
| Statistics Netherlands |                                                    |                                                                     | Employment                 |
